# Can the Tumor Deposits Be Counted as Metastatic Lymph Nodes in the UICC TNM Staging System for Colorectal Cancer?

Yong-Xi Song<sup>1</sup>\*, Peng Gao<sup>1</sup>\*, Zhen-Ning Wang<sup>1\*</sup>, Ji-Wang Liang<sup>1</sup>, Zhe Sun<sup>1</sup>, Mei-Xian Wang<sup>2</sup>, Yu-Lan Dong<sup>2</sup>, Xin-Fang Wang<sup>2</sup>, Hui-Mian Xu<sup>1</sup>

**1** Department of Surgical Oncology and General Surgery, First Hospital of China Medical University, Shenyang, People's Republic of China, **2** Department of Tumor Pathology and Surgical Oncology, First Hospital of China Medical University, Shenyang, People's Republic of China

## Abstract

**Objective:** The 7th edition of AJCC staging manual implicitly states that only T1 and T2 lesions that lack regional lymph node metastasis but have tumor deposit(s) will be classified in addition as N1c, though it is not consistent in that pN1c is also an option for pT3/T4a tumors in the staging table. Nevertheless, in this TNM classification, how to classify tumor deposits (TDs) in colorectal cancer patients with lymph node metastasis (LNM) and TDs simultaneously is still not clear. The aim of this study is to investigate the possibility of counting TDs as metastatic lymph nodes in TNM classification and to identify its prognostic value for colorectal cancer patients.

**Methods and Results:** In this retrospective study, 513 cases of colorectal cancer with LNM were reviewed. We proposed a novel pN (npN) category in which TDs were counted as metastatic lymph nodes in the TNM classification. Cancer-specific survival according to the npN or pN category was analyzed using Kaplan-Meier survival curves. Univariate and multivariate analyses were performed to identify significant prognostic factors. Harrell's C statistic was used to test the predictive capacity of the prognostic models. The results revealed that the TD was a significant prognostic factor in colorectal cancer. Univariate and multivariate analyses uniformly indicated that the npN category was significantly correlated with prognosis. The results of Harrell's C statistical analysis demonstrated that the npN category exhibited a superior predictive capacity compared to the pN category of the 7th edition TNM classification. Moreover, we also found no significant prognostic differences in patients with or without TD in the same npN categories.

**Conclusions:** The counting of TDs as metastatic lymph nodes in the TNM classification system is potentially superior to the classification in the 7th edition of the TNM staging system to assess prognosis and survival for colorectal cancer patients.

**Citation:** Song Y-X, Gao P, Wang Z-N, Liang J-W, Sun Z, et al. (2012) Can the Tumor Deposits Be Counted as Metastatic Lymph Nodes in the UICC TNM Staging System for Colorectal Cancer? PLoS ONE 7(3): e34087. doi:10.1371/journal.pone.0034087

**Editor:** Wafik S. El-Deiry, Penn State Hershey Cancer Institute, United States of America

**Received:** September 16, 2011; **Accepted:** February 21, 2012; **Published:** March 26, 2012

**Copyright:** © 2012 Song et al. This is an open-access article distributed under the terms of the Creative Commons Attribution License, which permits unrestricted use, distribution, and reproduction in any medium, provided the original author and source are credited.

**Funding:** This work was supported by the National Science Foundation of China (No. 30972879 and No. 81172370), Specialized Research Fund for the Doctoral Program of Higher Education (No. 200801590006) and the Natural Science Foundation of Liaoning Province (No. 20092129). The funders had no role in study design, data collection and analysis, decision to publish, or preparation of the manuscript.

**Competing Interests:** The authors have declared that no competing interests exist.

\* E-mail: josieon826@yahoo.com.cn

† These authors contributed equally to this work.

## Introduction

Colorectal cancer is the third most common malignancy in both men and women, and the second leading cause of cancer-related death in western developed countries [1,2]. Currently, the tumor stage remains to be the most important determinant of prognosis in colorectal cancer and it is the basis for the authoritative patient management guidelines that influence most patient management decisions. The International Union Against Cancer (UICC)/American Joint Committee on Cancer (AJCC) TNM classification system is the principal staging systems utilized and therapeutic decisions are most often based on this classification system [3]. Great changes in the TNM staging system for colorectal cancer have occurred from the 5th edition to the 7th edition, particularly regarding the pN classification [4–6].

Tumor deposits (TDs) are defined as focal aggregates of adenocarcinoma located in the pericolic or perirectal fat discontinuous with the primary tumor [7]. Recently, several studies have reported on prognostic analyses of TDs in colorectal cancer, and found that the presence of TDs was an important prognostic factor [8–11]. Colorectal cancer patients with TDs exhibited a poorer prognosis and lower survival rate compared to patients without such lesions. Due to the significant value in clinical practice, TDs were still taken into account in the current 7th edition of TNM classification for colorectal cancer, and a new pN1c category was proposed. It states that only T1 and T2 lesions that lack regional lymph node metastasis but have tumor deposit(s) will be classified in addition as N1c, though it is not consistent in that pN1c is also an option for pT3/T4a tumors in the staging table [6]. Although the latest TNM classification states that the

number of TDs should be recorded according to the categorization criteria, there are no guidelines on how to classify TDs in patients with lymph node metastasis(LNM) and TDs simultaneously. Therefore, this potentially impacts the accuracy of the classification, particularly how to assess these patients with colorectal cancer.

In the 7th edition of AJCC gastric cancer staging, pathologic assessment of the regional lymph nodes entails their removal and histologic examination to evaluate the total number of nodes, as well as the number that contain TDs, and TDs in the fat adjacent to a gastric regional LNM without evidence of residual lymph node tissue were considered as LNM [12]. In the light of these considerations, the aim of the present study is to investigate the possibility of counting TDs as metastatic lymph nodes in TNM classification when LNM and TDs exist simultaneously and to identify its prognostic value for colorectal cancer patients.

## Methods

### Participants

Information on all patients with stage III colorectal cancer who underwent radical surgery at the Department of Surgical Oncology at the First Hospital of China Medical University from April 1994 to December 2007 were retrospectively collected, reviewed, and analyzed. Patients with any of the following criteria were excluded from the present study: (i) patients who died in the immediate postoperative period (within 30 days), (ii) patients with multiple adenocarcinomas of colon and rectum, (iii) patients with synchronous or metachronous tumors, (iv) patients who underwent neoadjuvant treatment, (v) patients who were classified as pN1c or had no LNM, (vi) patients with distant metastasis found preoperatively, (vii) patients with incomplete pathological data entries, and (viii) patients who were lost to follow-up. After considering the above criteria, there were 513 colorectal cancer patients in our study. The clinical data including age, gender, date of surgery, date of death (if applicable), cause of death, date of follow-up, location of the primary tumor, tumor size, histologic grade, venous invasion, lymphovascular invasion, depth of invasion, number of lymph nodes retrieved, number of LNM, and number of TDs were obtained. Tumors originating from cecum to sigmoid colon were defined as colon cancer, and tumors located in the rectum or rectosigmoid junction were considered as rectal cancer [13].

### Pathological procedures

Specimens were fixed in formalin and stained with hematoxylin and eosin(H&E). Sections were examined by two independent pathologists and confirmed by a third expert to make the final diagnosis. Disagreements regarding the diagnosis were resolved as a consensus upon re-review of the slides with all three pathologists [14].

### Classification methods

All patients were firstly classified according to the 7th edition of the TNM staging system. Then, we utilized a new method to reclassify all cases with colorectal cancer exhibiting TDs and LNM simultaneously, namely, we counted TDs as LNM in the novel pN category. For our study purpose, the novel pN category and the novel TNM staging system were recorded as npN category and nTNM staging system.

### Follow up

Postoperative follow-up was completed for the entire study population until November 2008. Median and mean follow-up

periods were 30.72 months and  $39.85 \pm 29.94$  months (range: 1.1–164.3 months), respectively.

### Ethics statement

The study was approved by the Research Ethics Committee of China Medical University, China. Informed consent was obtained from all patients before participating in the study.

### Statistical Analysis

Continuous data were presented as the mean  $\pm$  standard deviation(SD). Cancer-specific survival was analyzed using Kaplan-Meier survival curves, and comparisons were made using the log-rank test. Multivariate analysis was performed using Cox's proportional hazards model. The predictive power of the individual models was evaluated using Harrell's C statistic. A model with perfect predictive capacity (sensitivity and specificity of 100%) would have a Harrell's C statistic of 1.00 and the highest Harrell's C statistic was chosen as the best model [15,16]. Statistical analyses and graphics were performed with PASW Statistics 18.0 software (SPSS, Inc., Somers, NY, USA) and STATA MP ver.10 (StataCorp LP, College Station, TX) statistical software. A value of  $P < 0.05$  was considered to be statistically significant.

## Results

Clinicopathological features of stage III colorectal cancer patients are listed in Table 1. Of the 513 patients, there were 277 (54.0%) males and 236 females (46.0%; ratio 1.2:1) with a mean age of  $59.63 \pm 11.78$  years (median 61 years; range 20–85 years). Among these patients, 212 patients (41.3%) had colon cancer and 301 patients (58.7%) had rectum cancer. TDs were found in 151 of 513 patients (29.4%), and the mean number of TDs retrieved was  $2.52 \pm 2.63$  (range 1–17). The median and mean number of lymph nodes metastasis was 2 and  $3.44 \pm 3.58$  (range 1–28), respectively. The median and mean number of lymph nodes retrieved was 11 and  $13.00 \pm 8.75$  (range 1–81), respectively.

Survival curves of 513 patients with colorectal cancer classified according to the different pN categories are shown in Fig. 1. As shown in Fig. 1A, upstaging occurred in 88 of 151 patients (58%) with TDs, and these patients staged by pN category showed a trend of migrating to a higher classification in nTNM staging system. There were significant prognostic differences among patients in the pN1a, pN1b, pN2a, and pN2b subcategories with regard to the pN category (Fig. 1B,  $P < 0.001$ ). Similarly, according to the npN category, significant differences were observed in the prognosis for these four subcategories (Fig. 1C,  $P < 0.001$ ). However, we found that certain patients showed stage migration as a result of the changes to the definition of the npN category.

Univariate analysis showed that the pN category, npN category, TNM classification and nTNM classification were significantly correlated with prognosis ( $P < 0.001$  for all) (Table 1). The variables pN and npN categories were highly correlated due to the fact that the npN category can be considered as an adjusted classification of the pN category. Therefore, multivariable models for the 513 patients were calculated separately for each variable to avoid bias in the estimation of variable effects (Table 2, 3). As shown in Tables 2 and 3, both the pN category and npN category were identified as independent prognostic factors by multivariate analyses ( $P < 0.001$  for both).

Next, the pN category, TNM classification, npN category and nTNM classification were measured by Harrell's C statistic to identify which has a superior predictive capacity. The results

**Table 1.** Univariate analysis of the prognostic factors for 513 patients.

|                                  | n <sup>a</sup> | 5-YSR <sup>b</sup> (%) | P      |
|----------------------------------|----------------|------------------------|--------|
| Gender                           |                |                        | 0.657  |
| Male                             | 277            | 46.0                   |        |
| Female                           | 236            | 47.4                   |        |
| Age,year                         |                |                        | 0.112  |
| ≤60                              | 252            | 49.6                   |        |
| >60                              | 261            | 43.6                   |        |
| Tumor location                   |                |                        | 0.551  |
| Colon                            | 212            | 50.6                   |        |
| Rectum                           | 301            | 44.5                   |        |
| Size                             |                |                        | 0.784  |
| ≤5.0 cm                          | 313            | 46.2                   |        |
| >5.0 cm                          | 200            | 47.3                   |        |
| Venous invasion                  |                |                        | 0.117  |
| Positive                         | 9              | 18.5                   |        |
| Negative                         | 504            | 47.5                   |        |
| Histologic grade                 |                |                        | 0.021  |
| Well                             | 189            | 52.7                   |        |
| Moderate                         | 263            | 44.2                   |        |
| Poor                             | 61             | 35.1                   |        |
| Lymphovascular invasion          |                |                        | <0.001 |
| Positive                         | 62             | 26.0                   |        |
| Negative                         | 451            | 49.5                   |        |
| The presence or absence of TDs   |                |                        | <0.001 |
| Positive                         | 151            | 33.0                   |        |
| Negative                         | 362            | 52.9                   |        |
| pT category                      |                |                        | <0.001 |
| pT1+pT2                          | 65             | 60.0                   |        |
| pT3                              | 352            | 50.1                   |        |
| pT4                              | 96             | 29.8                   |        |
| pN category                      |                |                        | <0.001 |
| pN1a                             | 172            | 59.9                   |        |
| pN1b                             | 180            | 51.0                   |        |
| pN2a                             | 96             | 32.1                   |        |
| pN2b                             | 65             | 17.4                   |        |
| npN <sup>c</sup> category        |                |                        | <0.001 |
| npN1a                            | 138            | 60.7                   |        |
| npN1b                            | 167            | 56.6                   |        |
| npN2a                            | 115            | 32.9                   |        |
| npN2b                            | 93             | 22.0                   |        |
| TNM staging system               |                |                        | <0.001 |
| IIIa                             | 56             | 66.2                   |        |
| IIIb                             | 362            | 50.8                   |        |
| IIIc                             | 95             | 20.9                   |        |
| nTNM <sup>d</sup> staging system |                |                        | <0.001 |
| IIIa                             | 53             | 66.4                   |        |
| IIIb                             | 343            | 51.1                   |        |
| IIIc                             | 117            | 23.6                   |        |

n<sup>a</sup>: Number of patients.5-YSR<sup>b</sup>: 5-year accumulative survival rate.**Table 1.** Cont.npN<sup>c</sup>: novel pN category.nTNM<sup>d</sup>: novel TNM staging system.

doi:10.1371/journal.pone.0034087.t001

indicated that the npN category (Harrell's C = 0.6309; 95% CI:0.5939–0.6680) was superior to the pN category (Harrell's C = 0.6197; 95% CI:0.5821–0.6573). Additionally, between the TNM classification (Harrell's C = 0.6187; 95% CI:0.5868–0.6507) and the nTNM classification (Harrell's C = 0.6286; 95% CI:0.5960–0.6611), the latter was regarded as the perfect predictive parameter.

To study whether one TD carries the same weight as one positive lymph node in terms of patient prognosis, we focused on the patients with pure positive lymph nodes (without TDs) and compared the survival of patients with the number of TDs plus the number of LNM to patients with the same npN of pure positive lymph nodes only. The results showed no prognostic heterogeneity (Fig. 2, P>0.05).

## Discussion

Tumor deposits were first described by Gabriel *et al* in 1935, who concluded that these phenomena were the result of vascular tumor dissemination [17]. Since then, TDs in adjacent adipose tissue have become a well-known feature of colorectal cancer, and many studies have investigated the clinical significance of TDs in patients with colorectal cancer [8–10]. A meta-analysis of the survival of 3714 colorectal cancer patients confirmed the correlation of TDs with adverse prognosis, including increased local recurrence rates and increased development of distant metastasis [8]. Some authors have suggested that survival of the patients with such lesions is significantly lower compared to those without TDs [8,11,18]. Moreover, it has been reported that an increasing number and diameter of TDs are highly associated with an even worse clinical outcome [11,18,19]. Therefore, it is clear that TDs play an important role in the prognosis of colorectal cancer. In the present study, we examined the 5-year survival of patients according to clinical variables by univariate analysis. Not surprisingly, the presence of TDs was an important prognostic predictor in colorectal cancer. The postoperative 5-year survival of patients with and without TDs was 33% and 52.9%, respectively, and the former had a worse disease-free survival compared with TD-negative patients. We concluded that TDs could be potentially regarded as an adverse prognostic factor in colorectal cancer. This is consistent with previous reports that TDs exhibit a strong correlation with cancer aggressiveness [8,11,18].

The UICC/AJCC TNM staging system, although controversial, is considered as the most powerful and reliable predictor of prognosis for colorectal cancer patients around the world [20]. Over the past 13 years, this classification system for colorectal cancer has been revised three times. Whether TDs should be regarded as pT stage, pN stage, pM stage, or even be excluded from consideration in determining tumor stage also has changed several times. The 7th edition of AJCC staging manual implicitly states that only T1 and T2 lesions that lack regional lymph node metastasis but have tumor deposit(s) will be classified in addition as N1c, though it is not consistent in that pN1c is also an option for pT3/T4a tumors in the staging table. Tong *et al*, in a study of 1541 patients with colorectal cancer, suggested that the 7th edition of the TNM staging system on TDs satisfactorily predicted patients'

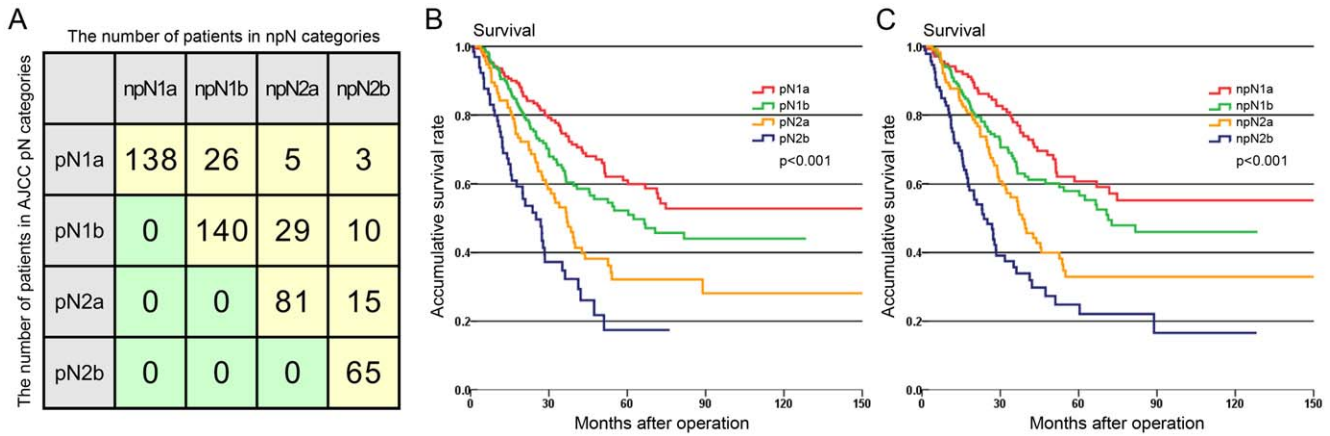

**Figure 1. Stage migration in 88 patients and survival curves of patients according to the pN category and npN category. A:** The number of patients who had stage migration in different subcategories. **B:** Survival curves showed different prognostic outcomes among patients with pN1a, pN1b, pN2a, and pN2b (P<0.001). **C:** Survival curves showed different prognostic outcomes among patients with npN1a, npN1b, npN2a, and npN2b (P<0.001). doi:10.1371/journal.pone.0034087.g001

outcome for those without LNM [21]. However, when colorectal cancer patients have LNM and TDs simultaneously, the TNM staging system dose not provide additional guidelines on staging for these patients. Therefore, the accuracy of the classification in these patients is potentially affected.

In the 7th edition of AJCC gastric cancer staging, TDs adjacent to a regional LNM without evidence of lymph node tissue were considered as LNM, and they were included in the number of lymph nodes for pathologic staging [12]. Wang *et al.*, in their study of 1580 cases of gastric cancer, proposed that TDs could be classified based on their number and prognostic information should be incorporated into the TNM staging system [22]. In addition, TDs were generally considered to represent LNM in Japanese classification of colorectal carcinoma [23]. In the light of these considerations, we ventured to propose a new method in which TDs could be counted as LNM to subcategory pN stage in patients with colorectal cancer.

Univariate and multivariate analyses uniformly demonstrated that the pN category and npN category were significantly correlated with patient prognosis. Our results indicated that the npN category we proposed could satisfactorily predict the prognostic outcome of patients with colorectal cancer. However, we also found that stage migration occurred in some patients with various pN subcategories due to the change in defination. There was a noticeable trend in which patients with TDs in pN subcategories were upgraded to a higher stage under the nTNM classification. To determine whether the npN category and nTNM classification were superior to the pN category and TNM classification in terms of prediction capacity, we used Harrell's C statistic for data analyses, the results indicated that the npN category and nTNM classification exhibited a stronger predictive power compared to the other two models. Moreover, we also found no significant prognostic differences in patients with or without TDs in the same npN categories (Fig. 2). It suggested one

**Table 2. Multivariate Analysis (Cox Proportional Hazard Model) of Prognostic Factors for 513 Patients with the pN category.**

|                         | HR <sup>a</sup> | 95% CI <sup>b</sup> | P      |
|-------------------------|-----------------|---------------------|--------|
| pT category             |                 |                     | <0.001 |
| pT1+pT2*                | 1               |                     |        |
| pT3                     | 1.127           | 0.725–1.752         |        |
| pT4                     | 2.229           | 1.380–3.598         |        |
| pN category             |                 |                     | <0.001 |
| pN1a*                   | 1               |                     |        |
| pN1b                    | 1.265           | 0.898–1.783         |        |
| pN2a                    | 1.676           | 1.148–2.445         |        |
| pN2b                    | 2.817           | 1.858–4.272         |        |
| TDs                     | 1.733           | 1.322–2.270         | <0.001 |
| Lymphovascular invasion | 2.115           | 1.449–3.087         | <0.001 |

HR<sup>a</sup>: hazard ratio.  
 CI<sup>b</sup>: confidence interval.  
 \*: reference category.  
 doi:10.1371/journal.pone.0034087.t002

**Table 3. Multivariate Analysis (Cox Proportional Hazard Model) of Prognostic Factors for 513 Patients with the npN<sup>a</sup> category.**

|                         | HR <sup>a</sup> | 95% CI <sup>b</sup> | P      |
|-------------------------|-----------------|---------------------|--------|
| pT category             |                 |                     | <0.001 |
| T1+T2*                  | 1               |                     |        |
| T3                      | 1.163           | 0.747–1.811         |        |
| T4                      | 2.241           | 1.386–3.624         |        |
| npN category            |                 |                     | <0.001 |
| npN1a*                  | 1               |                     |        |
| npN1b                   | 1.291           | 0.873–1.908         |        |
| npN2a                   | 1.611           | 1.062–2.442         |        |
| npN2b                   | 2.521           | 1.617–3.932         |        |
| TDs                     | 1.399           | 1.037–1.887         | 0.028  |
| Lymphovascular invasion | 2.387           | 1.649–3.454         | <0.001 |

npN<sup>a</sup>: novel pN category.  
 HR<sup>a</sup>: hazard ratio.  
 CI<sup>b</sup>: confidence interval.  
 \*: reference category.  
 doi:10.1371/journal.pone.0034087.t003

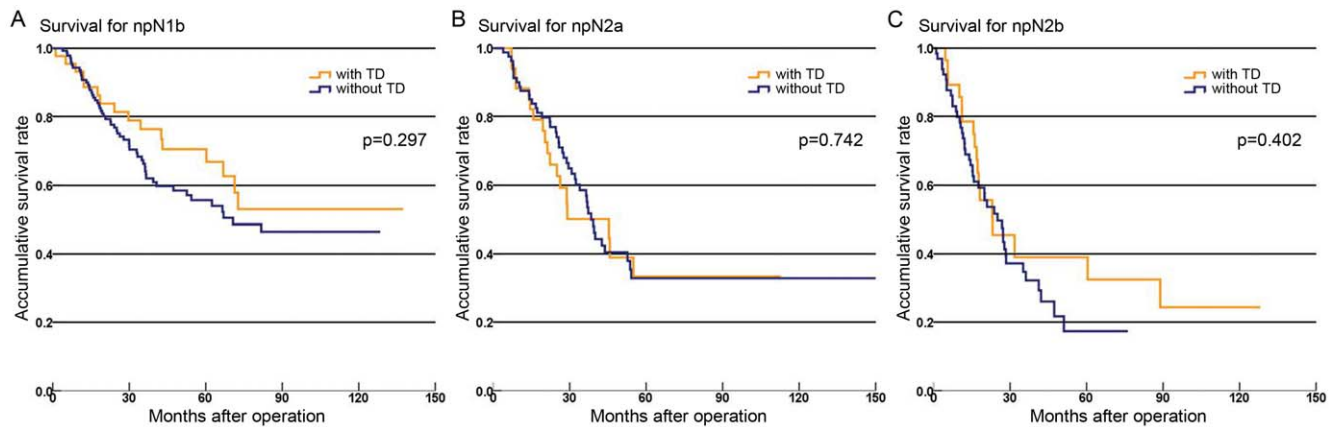

**Figure 2. Survival curves of patients with or without TDs in the same npN categories.** **A:** Survival curves showed similar prognostic outcomes between patients with or without TDs in npN1b ( $p = 0.297$ ). **B:** Survival curves showed similar prognostic outcomes between patients with or without TDs in npN2a ( $p = 0.742$ ). **C:** Survival curves showed similar prognostic outcomes between patients with or without TDs in npN2b ( $p = 0.402$ ).  
doi:10.1371/journal.pone.0034087.g002

TD carried the same weight as one positive lymph node in terms of patient prognosis. Therefore, we concluded that the npN category had superior clinical prognostic assessment in colorectal cancer patients.

The origin of TDs remains controversial until now. Some authors have proposed that TDs are derived from tumor growing inside or along lymphatic or vascular structures or nerves [8]. Others have suggested that TDs are potentially positive lymph nodes which are no longer recognizable because of their replacement by tumor cells [7]. Goldstein *et al*, in a study of 418 T3N+M0 patients with colorectal cancer, argued that the disease free survival impact of even small TDs was significant, suggesting that TDs of all sizes should be considered a single entity. The number and greatest dimension of TDs should be reported separately from lymph node metastasis [11]. In the present study, the results showed that the npN category and nTNM classification were superior to the pN category and TNM classification in assessing prognosis and survival of colorectal cancer patients. Taken together, it suggested that this new method could be used in the TNM staging system. According to our results, TDs had an adverse impact on prognosis and the influence of TDs on survival is potentially similar to LNM but different from hematogenous or implantation metastasis. We thought it was feasible that TDs was counted as LNM in the TNM classification of colorectal cancer. In addition, other authors have suggested that the perineural invasion associated with TDs was likely to occur in some colorectal cancer patients, resulting in a more adverse effect on 5-year survival

[19,24]. Thus, we should pay more attention to the TDs in clinical practice.

There are several limitations in this study. Our study is the result of a clinicopathological database of 513 Chinese colorectal cancer patients. Clearly, our conclusions showed the usual limitations of retrospective analysis from a single institution. At present, all studies on TDs in colorectal cancer are unicentric. On the other hand, although additional TD in the LNM confers a worse survival, the difference is rather small compared to using bona fide lymph node alone. Whether TD plus lymph node has any additional significant clinical impact to patient management need further investigation in larger samples. Therefore, we look forward to performing larger sample studies and international multicentric research on TDs in patients with colorectal cancer.

In conclusion, according to the results of our study, we found that it was feasible to count TDs as metastatic lymph nodes in the TNM staging system when assessing patients with colorectal cancer. The new method we proposed is potentially superior to the current 7th edition of TNM staging system for assessing prognosis and survival of colorectal cancer patients.

## Author Contributions

Conceived and designed the experiments: ZNW HMX YXS. Performed the experiments: JWJ ZNW PG YXS MXW YLD XFW. Analyzed the data: JWJ PG ZS YXS. Contributed reagents/materials/analysis tools: HMX MXW YLD XFW. Wrote the paper: YXS PG.

## References

- Landis SH, Murray T, Bolden S, Wingo PA (1999) Cancer statistics, 1999. *CA Cancer J Clin* 49: 8–31.
- Levin B, Brooks D, Smith RA, Stone A (2003) Emerging technologies in screening for colorectal cancer: CT colonography, immunochemical fecal occult blood tests, and stool screening using molecular markers. *CA Cancer J Clin* 53: 44–55.
- Compton CC (2006) Key issues in reporting common cancer specimens: problems in pathologic staging of colon cancer. *Arch Pathol Lab Med* 130: 318–324.
- Sobin LH, Wittekind C (1997) UICC TNM classification of malignant tumours, 5th edition.
- Sobin LH, Wittekind C (2002) TNM classification of malignant tumours, 6th edition.
- Sobin LH, Gospodarowicz MK, Wittekind C (2010) TNM classification of malignant tumours, 7th edition.
- Belt EJ, van Stijn MF, Bril H, de Lange-de Klerk ES, Meijer GA, et al. (2010) Lymph node negative colorectal cancers with isolated tumor deposits should be classified and treated as stage III. *Ann Surg Oncol* 17: 3203–3211.
- Nagtegaal ID, Quirke P (2007) Colorectal tumour deposits in the mesorectum and pericolon: a critical review. *Histopathology* 51: 141–149.
- Tateishi S, Arima S, Futami K, Kawahara K, Tachikawa D, et al. (2005) A clinicopathological investigation of “tumor nodules” in colorectal cancer. *Surg Today* 35: 377–384.
- Prabhudesai A, Arif S, Finlayson CJ, Kumar D (2003) Impact of microscopic extranodal tumor deposits on the outcome of patients with rectal cancer. *Dis Colon Rectum* 46: 1531–1537.
- Goldstein NS, Turner JR (2000) Pericolonic tumour deposits in patients with T3N+M0 colon adenocarcinomas: markers of reduced disease free survival and

- intra-abdominal metastases and their implications for TNM classification. *Cancer* 88: 2228–2238.
12. Edge SB, Byrd DR, Compton CC, Fritz AG, Greene FL, et al. (2010) *AJCC cancer staging handbook*, 7th edition. New York: Springer. 149 p.
  13. Chok KS, Law WL (2007) Prognostic factors affecting survival and recurrence of patients with pT1 and pT2 colorectal cancer. *World J Surg* 31: 1485–1490.
  14. Sun Z, Zhu GL, Lu C, Guo PT, Huang BJ, et al. (2009) A novel subclassification of pT2 gastric cancers according to the depth of muscularis propria invasion: superficial muscularis propria versus deep muscularis propria/subserosa. *Ann Surg* 249: 768–775.
  15. Harrell FE, Jr., Lee KL, Mark DB (1996) Multivariable prognostic models: issues in developing models, evaluating assumptions and adequacy, and measuring and reducing errors. *Stat Med* 15: 361–387.
  16. Harrell FE, Jr., Lee KL, Califf RM, Pryor DB, Rosati RA (1984) Regression modelling strategies for improved prognostic prediction. *Stat Med* 3: 143–152.
  17. Gabriel WB, Dukes CE, Bussey HJR (1935) Lymphatic spread in cancer of the rectum. *Br J Surg* 23: 395–413.
  18. Ueno H, Mochizuki H (1997) Clinical significance of extrabowel skipped cancer infiltration in rectal cancer. *Surg Today* 27: 617–622.
  19. Ueno H, Mochizuki H, Hashiguchi Y, Ishiguro M, Miyoshi M, et al. (2007) Extramural cancer deposits without nodal structure in colorectal cancer: optimal categorization for prognostic staging. *Am J Clin Pathol* 127: 287–294.
  20. Han HQ, Liu T, Zhao LZ, Qi F, Wang PZ (2006) Clinical value of the sixth edition TNM stages analysing prognosis of colorectal cancer. *Zhonghua Yi Xue Za Zhi* 86: 819–821.
  21. Tong LL, Gao P, Wang ZN, Song YX, Xu YY, et al. (2012) Is the 7th edition of the UICC/AJCC TNM staging system reasonable for patients with tumor deposits in colorectal cancer? *Ann Surg* 255: 208–213.
  22. Wang W, Li Y, Zhang Y, Yuan X, Xu D, et al. (2011) Incorporation of extranodal metastasis of gastric carcinoma into the 7th edition UICC TNM staging system. *PLoS One* 6: e19557.
  23. Kanehara & Co., LTD Tokyo (1997) *Japanese Society for Cancer of the Colon and Rectum: Japanese classification of Colorectal Carcinoma, First English Edition*.
  24. Ueno H, Mochizuki H, Shirouzu K, Kusumi T, Yamada K, et al. (2011) Actual status of distribution and prognostic impact of extramural discontinuous cancer spread in colorectal cancer. *J Clin Oncol* 29: 2550–2556.
